# Supplementary material for: Molecular quantification of Plasmodium parasite density from the blood retained in used RDTs
Source: PubMed Central journal article supplement (PMC6434039; doi:10.1038/s41598-019-41438-0), 2019-03-25
Supplement: 41598_2019_41438_MOESM1_ESM.pdf [file 41598_2019_41438_MOESM1_ESM.pdf]

# Molecular quantification of *Plasmodium* parasite density from the blood retained in used RDTs

Ailie Robinson\*

London School of Hygiene and Tropical Medicine, Keppel Street, London, WC1E 7HT, United Kingdom.  
[ailie.robinson@lshtm.ac.uk](mailto:ailie.robinson@lshtm.ac.uk)

Annette O Busula

Affiliations for this study: Laboratory of Entomology, Wageningen University & Research, 6708 PB, Wageningen, The Netherlands, International Centre of Insect Physiology and Ecology, Nairobi, Kenya. Current affiliation: Department of Biological and Agricultural Sciences, Kaimosi Friends University College, a constituent college of Masinde Muliro University of Science and Technology, Kaimosi, Kenya.

[abusula@kafuco.ac.ke](mailto:abusula@kafuco.ac.ke)

Julian K. Muwanguzi

London School of Hygiene & Tropical Medicine, Keppel Street, London, WC1E 7HT, United Kingdom.  
[Julian.Muwanguzi@lshtm.ac.uk](mailto:Julian.Muwanguzi@lshtm.ac.uk)

Stephen J. Powers

Affiliations for this study: Computational and Analytical Sciences, Rothamsted Research, Harpenden, Hertfordshire, AL5 2JQ, United Kingdom. Current affiliation: Rylands Farm, East Lambrook Road, South Petherton, Somerset, TA13 5HP, United Kingdom.

[powerssj@gmail.com](mailto:powerssj@gmail.com)

Daniel K. Masiga

Animal Health, International Centre of Insect Physiology and Ecology, PO Box 30772-00100, Nairobi, Kenya.

[dmasiga@icipe.org](mailto:dmasiga@icipe.org)

Teun Bousema

London School of Hygiene & Tropical Medicine, Keppel Street, London, WC1E 7HT, United Kingdom, and Medical Microbiology, Radboud University Medical Centre, Geert Grooteplein 26-28, 6525 GA Nijmegen, The Netherlands.

[Teun.Bousema@radboudumc.nl](mailto:Teun.Bousema@radboudumc.nl)

Willem Takken,

Laboratory of Entomology, Wageningen University & Research, PO Box 16, 6700 AA, Wageningen, The Netherlands.

[willem.takken@wur.nl](mailto:willem.takken@wur.nl)

Jetske G de Boer

Affiliation for this study: Laboratory of Entomology, Wageningen University & Research, 6708 PB, Wageningen, The Netherlands. Current affiliation: Netherlands Institute of Ecology, 6708 PB, Wageningen, The Netherlands.

[J.deBoer@nioo.knaw.nl](mailto:J.deBoer@nioo.knaw.nl)

James G. Logan

London School of Hygiene & Tropical Medicine, Keppel Street, London, WC1E 7HT, United Kingdom.

[James.Logan@lshtm.ac.uk](mailto:James.Logan@lshtm.ac.uk)

Khalid B. Beshir

London School of Hygiene & Tropical Medicine, Keppel Street, London, WC1E 7HT, United Kingdom.

[Khalid.Beshir@lshtm.ac.uk](mailto:Khalid.Beshir@lshtm.ac.uk)

Colin J. Sutherland

London School of Hygiene & Tropical Medicine, Keppel Street, London, WC1E 7HT, United Kingdom.

[Colin.Sutherland@lshtm.ac.uk](mailto:Colin.Sutherland@lshtm.ac.uk)

\*Corresponding author

## Supplementary Information

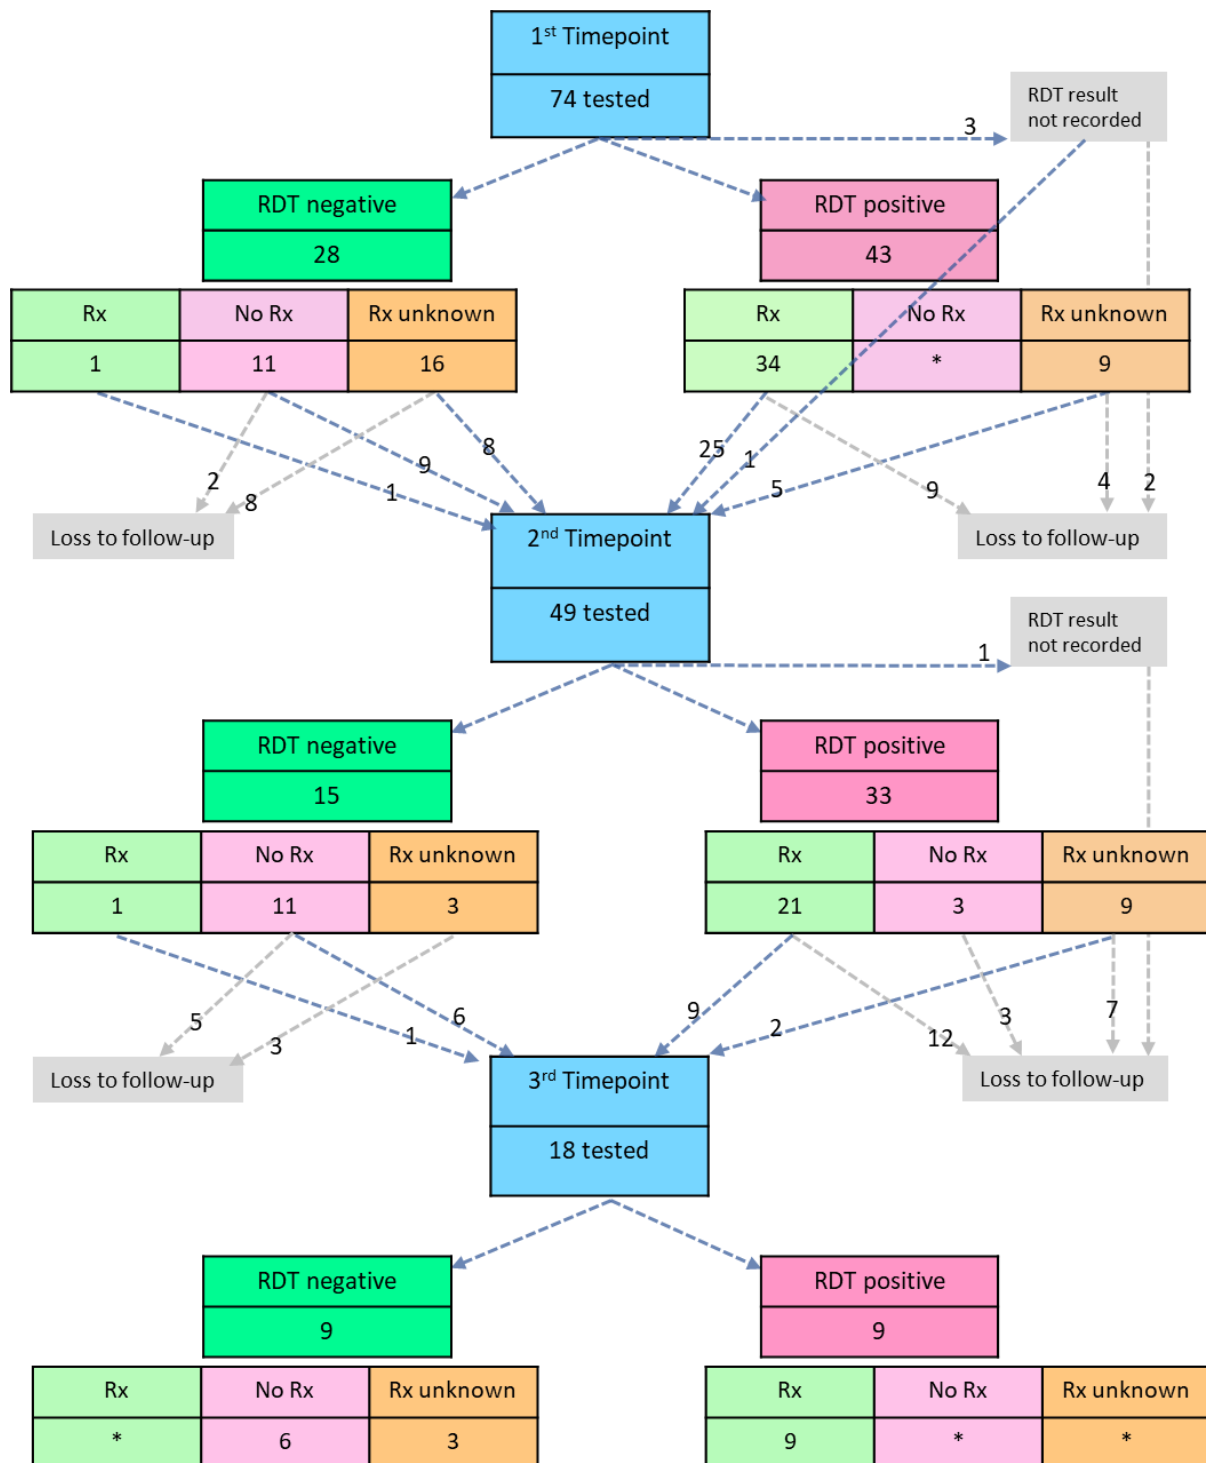

Supplementary Figure S1. The samples that were used in this study were collected from five- to 12-year-old-children, who were participating in a malaria odour study. Samples for that study were collected over three timepoints; in the present study parasite density was estimated using paired RDT and DBS blood samples from all available samples. Antimalarial treatment with artemether-lumefantrine was administered to all *Plasmodium*-positive individuals according to manufacturer's instructions.

Supplementary Table S1. The result of the RDT test (Pos P.f. or Pos P.f./pan grouped together as 'positive') in comparison to *Plasmodium* parasite positivity as determined by duplex qPCR based on two templates, fragments of the nitrocellulose membrane within a used rapid diagnostic test (RDT<sub>DNA</sub>) or dried blood spots collected onto Whatman filter paper Number 3 (DBS<sub>DNA</sub>). Column (1) shows the result of the RDT, columns (2) and (4) show agreement of the duplex qPCR (positive/negative) with RDT result according to the two templates, column (3) shows agreement of DBS<sub>DNA</sub> template qPCR with RDT<sub>DNA</sub> template qPCR, per RDT outcome.

| 1                         | 2                                                                | 3                                                                                            | 4                                                                |
|---------------------------|------------------------------------------------------------------|----------------------------------------------------------------------------------------------|------------------------------------------------------------------|
| RDT result, n (%)         | qPCR RDT <sub>DNA</sub> template agreement with RDT result n (%) | DBS <sub>DNA</sub> template agreement with RDT <sub>DNA</sub> template, per RDT result n (%) | qPCR DBS <sub>DNA</sub> template agreement with RDT result n (%) |
| Positive:<br>86 (60.99)   | Positive, 48 (55.81) <sup>(A)</sup>                              | Positive, 39 (81.25)                                                                         | Positive, 47 (54.65)                                             |
|                           |                                                                  | Inconclusive, 1 (2.08) <sup>(B)</sup>                                                        |                                                                  |
|                           |                                                                  | Negative, 8 (16.67)                                                                          |                                                                  |
|                           | Inconclusive, 9 (10.47)                                          | Positive, 3 (33.33)                                                                          | Inconclusive, 9 (10.47)                                          |
|                           |                                                                  | Inconclusive, 1 (11.11)                                                                      |                                                                  |
|                           |                                                                  | Negative, 5 (55.56)                                                                          |                                                                  |
|                           | Negative, 29 (33.72)                                             | Negative, 17 (58.62)                                                                         | Negative, 30 (34.88)                                             |
|                           |                                                                  | Inconclusive, 7 (24.14)                                                                      |                                                                  |
|                           |                                                                  | Positive, 5 (17.24)                                                                          |                                                                  |
| Negative:<br>52 (36.88)   | Negative, 23 (44.23)                                             | Positive, 3 (13.04) <sup>(C)</sup>                                                           | Negative, 35 (67.31)                                             |
|                           |                                                                  | Inconclusive, 5 (21.74)                                                                      |                                                                  |
|                           |                                                                  | Negative, 15 (65.44)                                                                         |                                                                  |
|                           | Inconclusive, 13 (25.0)                                          | Positive, 1 (7.69)                                                                           | Inconclusive, 11 (21.15)                                         |
|                           |                                                                  | Inconclusive, 3 (23.08)                                                                      |                                                                  |
|                           |                                                                  | Negative, 9 (69.23)                                                                          |                                                                  |
|                           | Positive, 16 (30.77) <sup>(D)</sup>                              | Positive, 2 (12.5) <sup>(E)</sup>                                                            | Positive, 6 (11.54)                                              |
|                           |                                                                  | Inconclusive, 3 (18.75)                                                                      |                                                                  |
|                           |                                                                  | Negative, 11 (68.75)                                                                         |                                                                  |
| Not recorded:<br>3 (2.13) | Inconclusive, 1 (33.33)                                          | Negative, 1 (100)                                                                            | Negative, 2 (66.67)                                              |
|                           | Negative, 2 (66.67)                                              | Negative, 1 (50)                                                                             |                                                                  |
|                           |                                                                  | Inconclusive, 1 (50)                                                                         |                                                                  |

<sup>(A)</sup> qPCR positive samples had detectable parasite DNA in each of two technical replicates.

<sup>(B)</sup> Inconclusive samples were those with one positive and one negative replicate.

<sup>(C)</sup> Samples were 6, 25.33, 187.50 p/μL

<sup>(D)</sup> Mean/median: 26.73/0.02 p/μL

<sup>(E)</sup> Samples were 12.47 and 8.76 p/μL
